# Supplementary material for: A new highly transparent injectable PHA-based thermogelling vitreous substitute
Source: Royal Society of Chemistry journal article supplement (doi:10.1039/c9bm01603a), 2019-11-25
Supplement: c9bm01603a1.pdf [file c9bm01603a1.pdf]

## Supplementary information

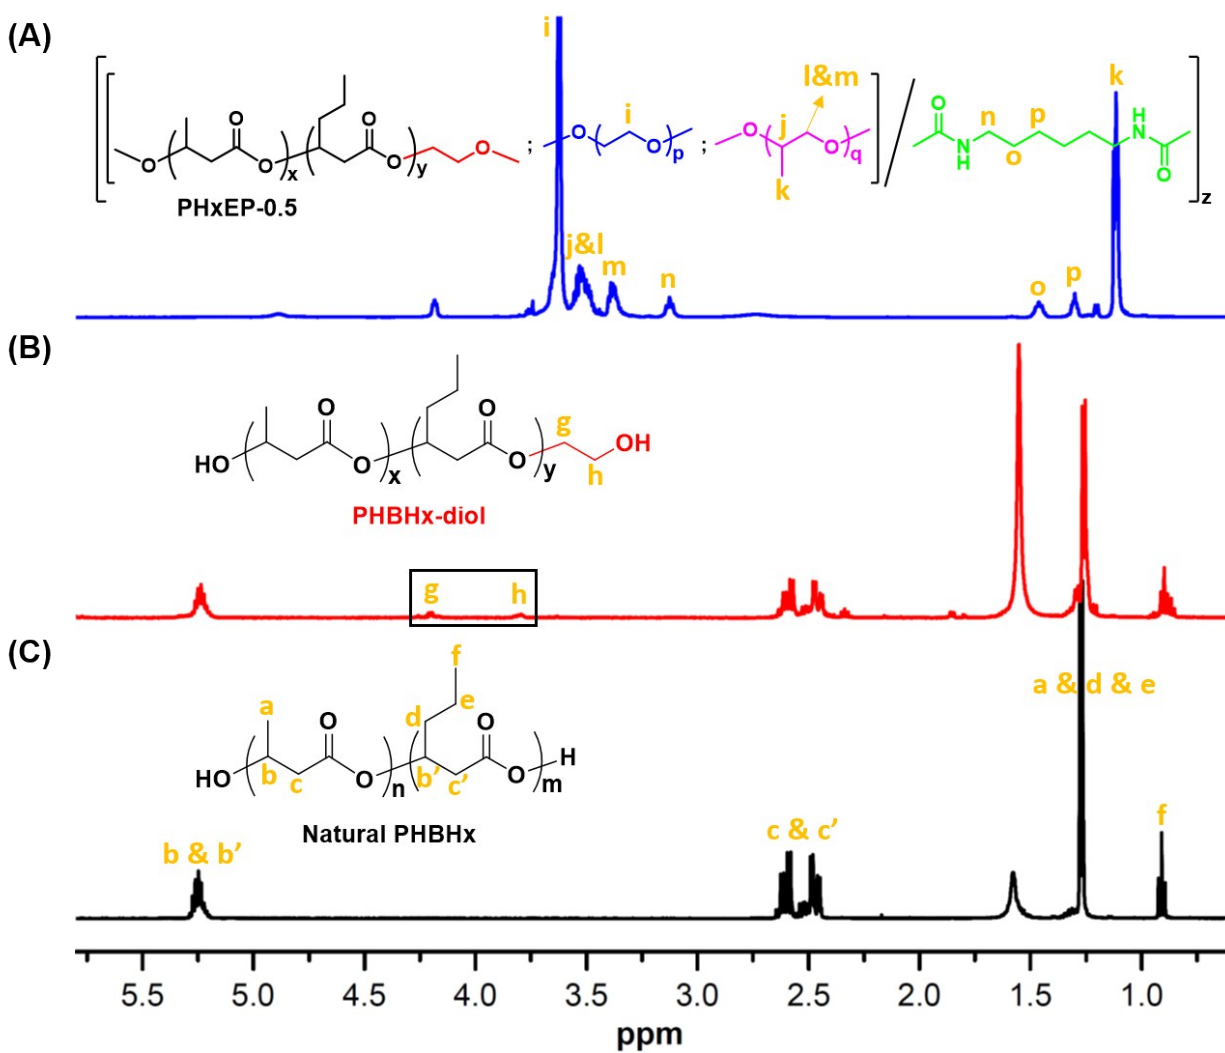

**Figure S1.**  $^1\text{H}$  NMR spectra of PHxEP-0.5 (A), PHBHx-diol (B) and natural PHBHx (C) in  $\text{CDCl}_3$ .

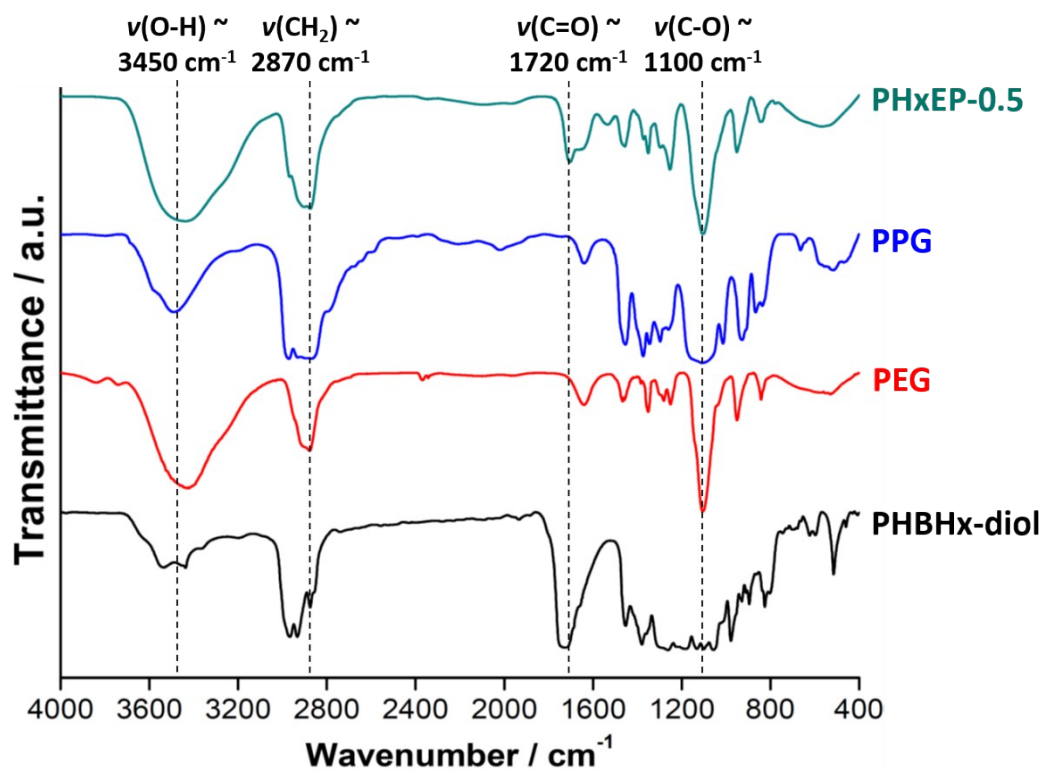

**Figure S2.** Normalized FT-IR spectra of PHBHp-diols and PHxEP-0.5 copolymer.

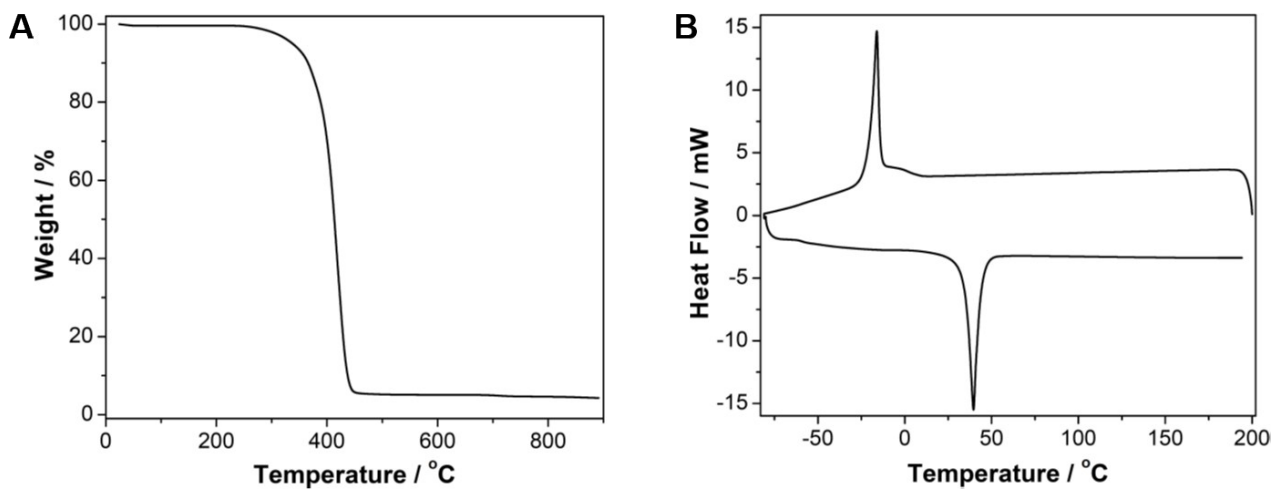

**Figure S3.** Thermal analysis of the copolymer PHxEP-0.5. A. TGA curve; B. DSC curve.

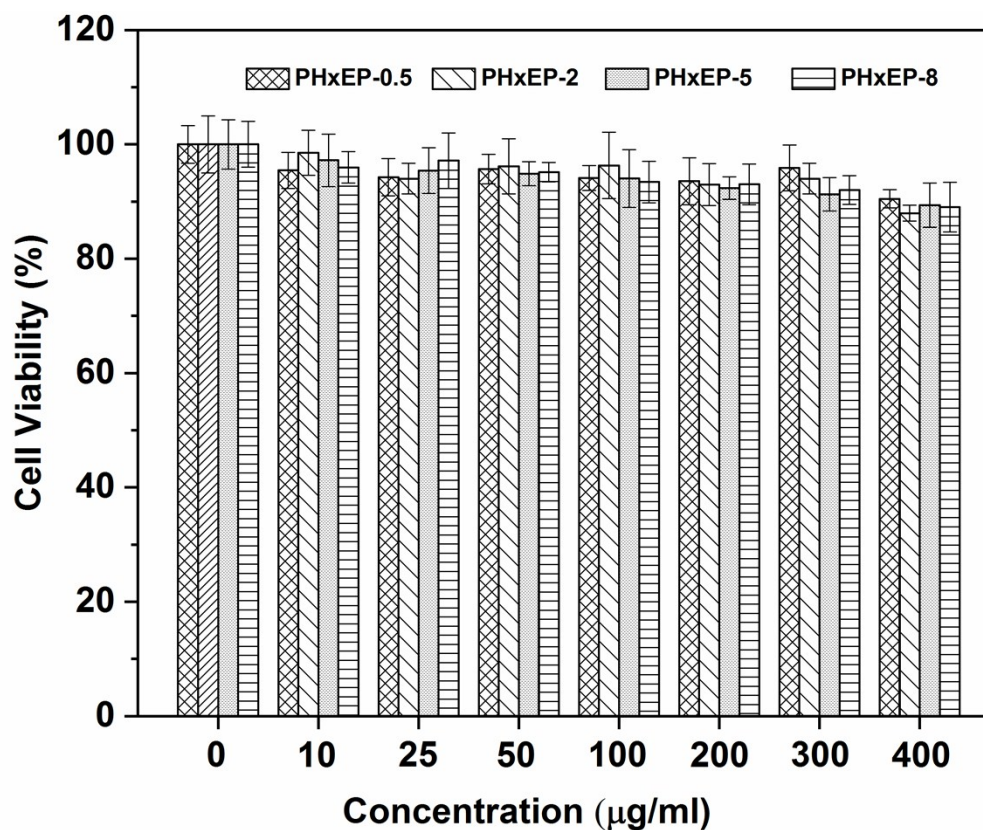

**Figure S4.** *In vitro* cytotoxicity study of the PHxEP copolymers. The PHxEP copolymers did not show significant cell toxicity against L929 cells, and relative cell viabilities were 90 % or higher.

**Supplementary video.** Procedure of conducting vitrectomy surgery and injecting PHxEP gel into the rabbit eye.
